# Supplementary material for: Endocytic recycling via the TGN underlies the polarized hyphal mode of life
Source: PubMed Central journal article supplement (PMC5880334; doi:10.1371/journal.pgen.1007291), 2018-04-02
Supplement: pgen.1007291.s001.pdf [file pgen.1007291.s001.pdf]

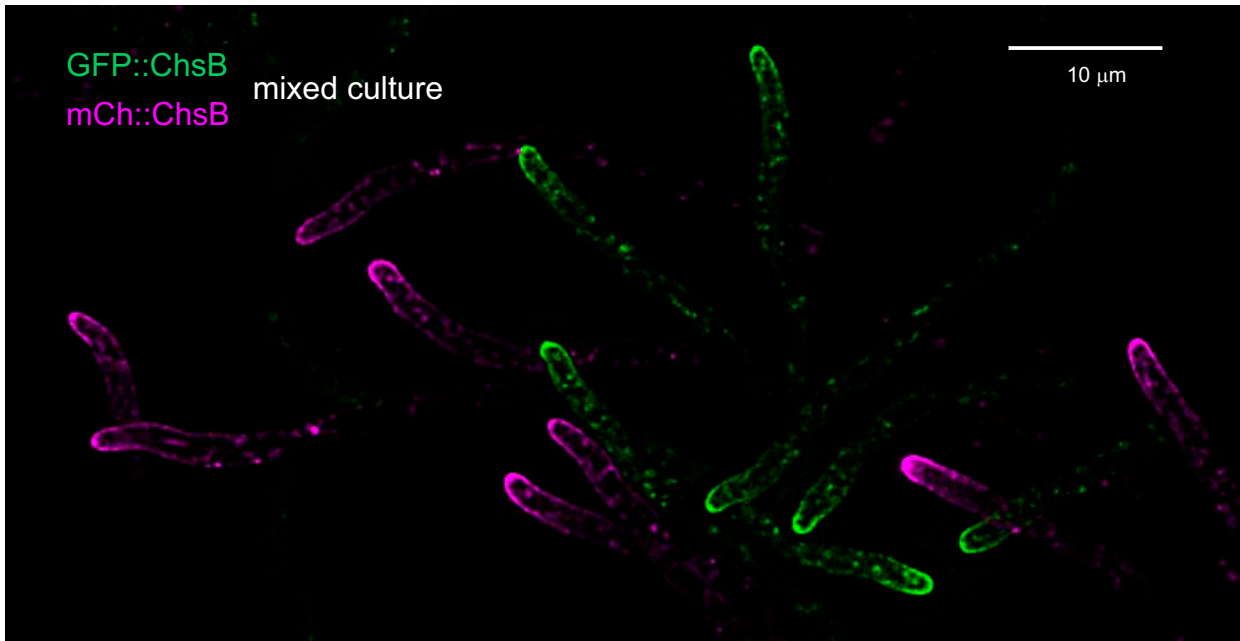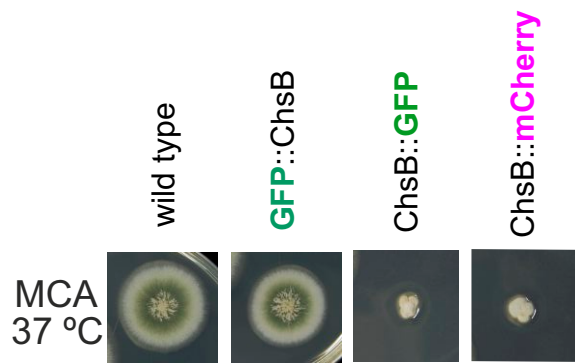

**S1 Figure: mCh-ChsB and GFP-ChsB comparison**

Top, merge of MIPs of deconvolved z-stacks of a mixed culture of gene-replaced mCh-ChsB and GFP-ChsB strains. Bottom, growth phenotype of the indicated gene-replaced strains is compared to the wt.
