# Supplementary material for: Endocytic recycling via the TGN underlies the polarized hyphal mode of life
Source: PubMed Central journal article supplement (PMC5880334; doi:10.1371/journal.pgen.1007291), 2018-04-02
Supplement: pgen.1007291.s002.pdf [file pgen.1007291.s002.pdf]

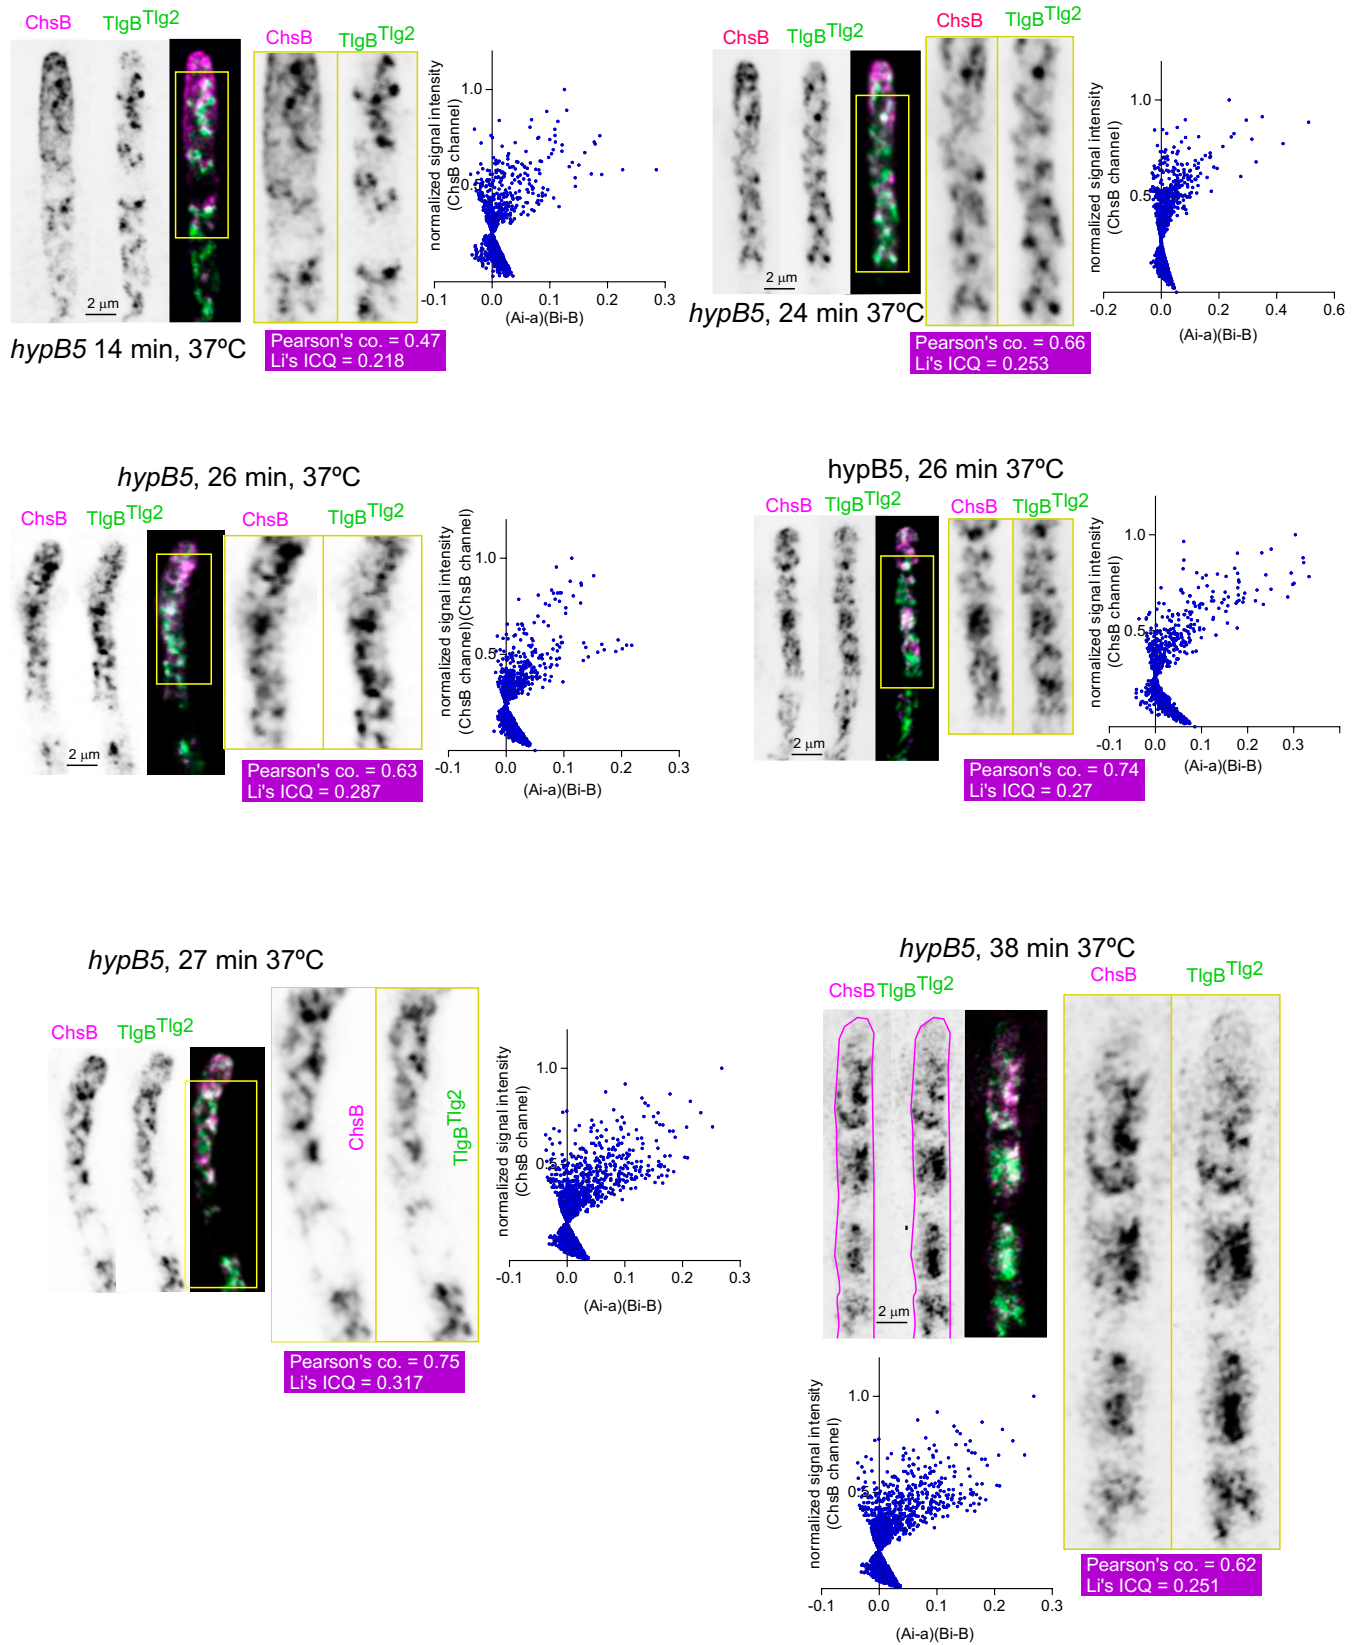

**S2 Figure. Colocalization analyses of mCh-ChsB and GFP-TlgB<sup>Tlg2</sup> in a *hypB5* (sec7<sup>ts</sup>) strain**  
 Pictures taken at different times after shifting cells at 37°C, with indication of Pearson's and Li's colocalization coefficients. Plots were used to calculate Li's ICQ.
