# Supplementary material for: Endocytic recycling via the TGN underlies the polarized hyphal mode of life
Source: PubMed Central journal article supplement (PMC5880334; doi:10.1371/journal.pgen.1007291), 2018-04-02
Supplement: pgen.1007291.s003.pdf [file pgen.1007291.s003.pdf]

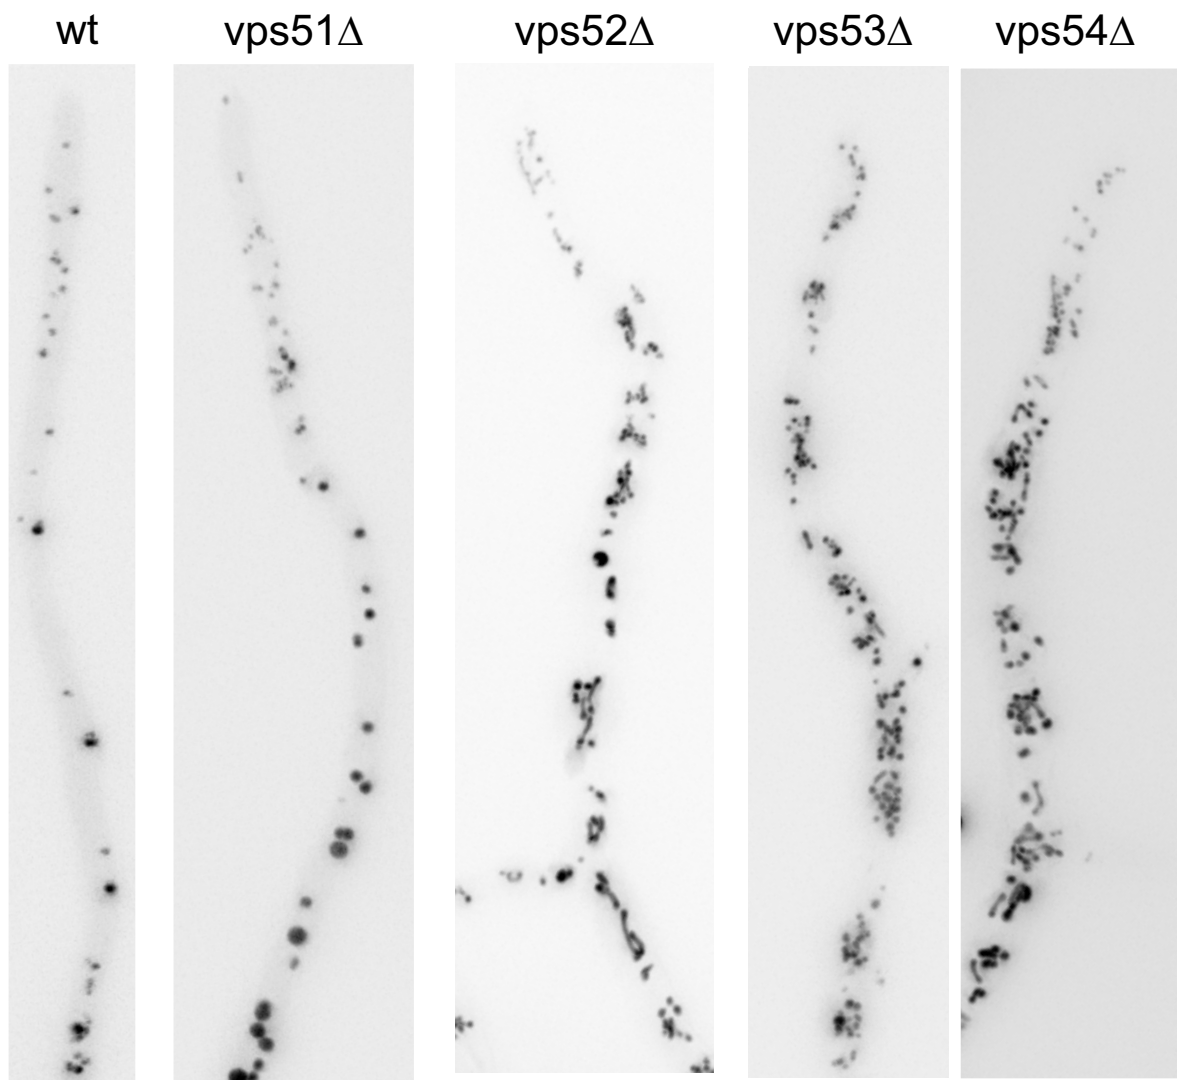

**S3 Figure. CMAc staining of vacuoles in hyphae of strains with the indicated genotypes.**
