# Supplementary material for: Endocytic recycling via the TGN underlies the polarized hyphal mode of life
Source: PubMed Central journal article supplement (PMC5880334; doi:10.1371/journal.pgen.1007291), 2018-04-02
Supplement: pgen.1007291.s004.pdf [file pgen.1007291.s004.pdf]

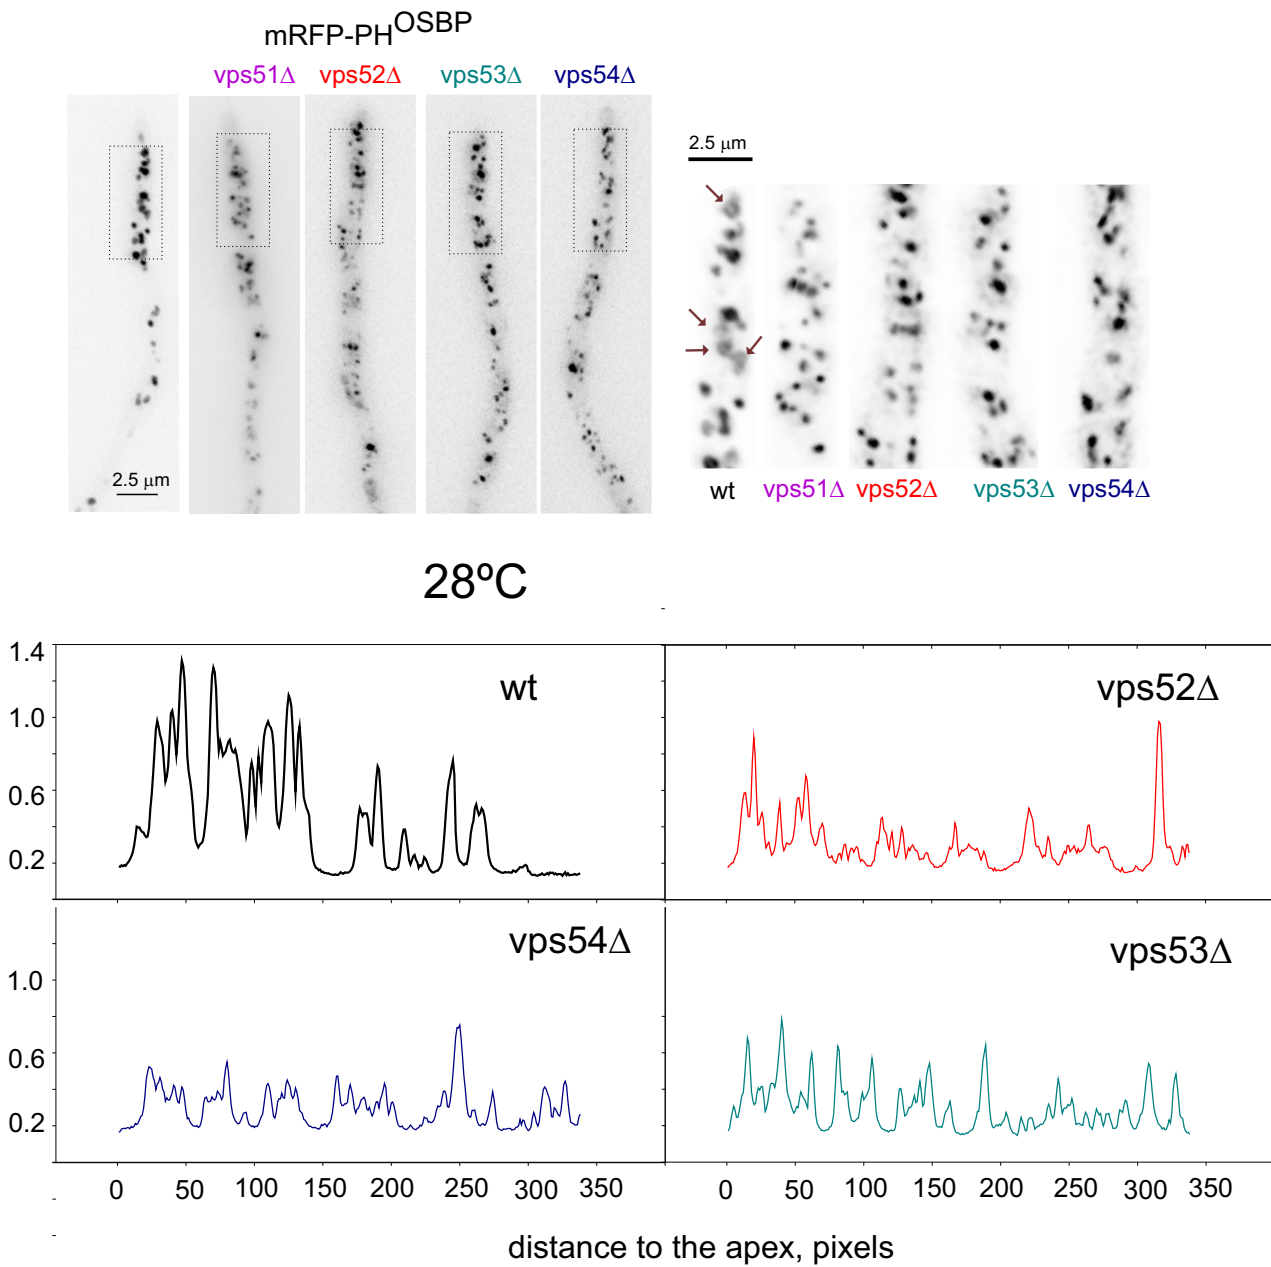

**S4 Figure. Abnormal morphology and depolarization of TGN cisternae resulting from GARP mutations.** Cisternae of the TGN were labeled with PH<sup>OSBP</sup>. Boxed regions were magnified 2.5 times in the right insets. Arrows point at examples of typically fenestrated cisternae that are not seen in the mutants. For linescans, 1 px = 0.103 μm
