# Supplementary material for: Endocytic recycling via the TGN underlies the polarized hyphal mode of life
Source: PubMed Central journal article supplement (PMC5880334; doi:10.1371/journal.pgen.1007291), 2018-04-02
Supplement: pgen.1007291.s005.pdf [file pgen.1007291.s005.pdf]

GFP-ChsB levels

vps52 $\Delta$  wild-type

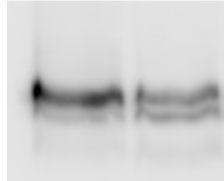

anti-GFP WB

vps52 $\Delta$  wild-type

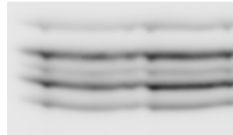

loading control

anti-PSTAIR (CDKs) WB

**S5 Figure. Levels of GFP-ChsB are similar in wt and vps52 $\Delta$  cells.**

Anti-GFP was used to detect GFP-ChsB. Anti-PSTAIR antibody (AbCam) was used for the loading control. This antibody detects a conserved epitope present in cyclin-dependent kinases. In *A. nidulans* it reacts with PhoA (41.3 kDa), NimX<sup>Cdc2</sup> (36.8 kDa) and PhoB (35.9 kDa) cyclin-dependent kinases.
