# Supplementary material for: Endocytic recycling via the TGN underlies the polarized hyphal mode of life
Source: PubMed Central journal article supplement (PMC5880334; doi:10.1371/journal.pgen.1007291), 2018-04-02
Supplement: pgen.1007291.s006.pdf [file pgen.1007291.s006.pdf]

Table S1. *A. nidulans* strains used in this work.

| MAD number | Genotype                                                                                                                                                            | Source                           |
|------------|---------------------------------------------------------------------------------------------------------------------------------------------------------------------|----------------------------------|
| 2          | <i>biA1</i>                                                                                                                                                         | Our collection                   |
| 3579       | <i>wA4; pyroA4[pyroA*-gpdA<sup>mini</sup>::mrfp-PH<sup>OSBP</sup>]</i>                                                                                              | Pantazopoulou <i>et al.</i> 2009 |
| 5854       | <i>pyrG89; nkuAΔ::bar pyroA4; pyrG<sup>Af</sup>::chsBprom-chsB</i>                                                                                                  | This work                        |
| 5559       | <i>pyrG89; pyroA4 nkuAΔ::bar; chsB-gfp::pyrG<sup>Af</sup></i>                                                                                                       | This work                        |
| 5626       | <i>pyrG89; nkuAΔ::bar pyroA4; chsB-mCherry-3'UTR-pyrG<sup>Af</sup></i>                                                                                              | This work                        |
| 5851       | <i>pyrG89; nkuAΔ::bar pyroA4; pyrG<sup>Af</sup>::chsBprom::gfp-chsB</i>                                                                                             | This work                        |
| 5895       | <i>pyrG89; nkuAΔ::bar; pyroA4[gpdAmini::mRFP::PH<sup>OSBP</sup>]; pyrG<sup>Af</sup>::gfp-chsB</i>                                                                   | This work                        |
| 5897       | <i>pyrG89? hypA1 pabaA1; nkuAΔ::bar?; pyrG<sup>Af</sup>::chsBprom::gfp-chsB</i>                                                                                     | This work                        |
| 5924       | <i>pyrG89 pabaA1 yA2; nkuAΔ::bar?; pyrG<sup>Af</sup>::gfp-chsB abpA-mRFP::pyrG<sup>Af</sup></i>                                                                     | This work                        |
| 5928       | <i>pyrG89; nkuAΔ::bar pyroA4; pyrG<sup>Af</sup>::chsBprom::mCherry-chsB</i>                                                                                         | This work                        |
| 5981       | <i>pyrG<sup>Af</sup>::mCherry-chsB rabEp::rabE::rabEp::gfp-rabE::pyrG<sup>Af</sup> pyrG89? nkuAΔ:: bar? pyroA4 pantoB100</i>                                        | This work                        |
| 6058       | <i>pyrG<sup>Af</sup>::ChsBprom::mCherry-chsB pyrG<sup>Af</sup>::GFP-synA pyroA4 pyrG89? nkuAΔ::bar?</i>                                                             | This work                        |
| 6116       | <i>pyrG89?; nkuAΔ:: bar?; pantoB100 vps33<sup>ts</sup> pyrG<sup>Af</sup>::gfp-chsB</i>                                                                              | This work                        |
| 6222       | <i>pyrG89; nkuAΔ:: bar rabCΔ::riboB<sup>Af</sup>; pyrG<sup>Af</sup>-gfp-chsB; riboB2</i>                                                                            | This work                        |
| 6253       | <i>pyrG89? hypB5; nkuAΔ::bar?; pyroA4; pyrGAf::chsBprom-mCherry-chsB; geaA1-gfp</i>                                                                                 | This work                        |
| 6268       | <i>pyrG89?; argB2[argB*-alcA-gfp-rabE]?; nkuAΔ::bar?; pyroA4::[pyroA<sup>t</sup>-gpdA<sup>mini</sup>-gfp-tlgB]; pyrG<sup>Af</sup>::chsBprom::mCherry-chsB</i>       | This work                        |
| 6269       | <i>pyrG89? hypB5; argB2[argB*-alcA-gfp-rabE]?; nkuAΔ::bar?; pyroA4::[pyroA<sup>t</sup>-gpdA<sup>mini</sup>-gfp-tlgB]; pyrG<sup>Af</sup>::chsBprom::mCherry-chsB</i> | This work                        |
| 6327       | <i>pyrG89; riboB<sup>Af</sup>-prom-gfp-chsB; nkuAΔ::bar pyroA4; riboB2</i>                                                                                          | This work                        |
| 6402       | <i>fimAΔ::tn31::pyr4 pyrG89?; nkuAΔ::bar?; pyrG<sup>Af</sup>::chsBprom::gfp-chsB pantoB100</i>                                                                      | This work                        |
| 6422       | <i>pyrG89; vps52::pyrG<sup>Af</sup>; nkuAΔ::bar pyroA4; riboB<sup>Af</sup>-prom-gfp-chsB; riboB2</i>                                                                | This work                        |
| 6510       | <i>pyrG89?; nkuAΔ::bar inoB2 pyroA4[pyroA*-gpdAsh::mCherry::sed5]; pyrG<sup>Af</sup>::chsBprom-gfp-chsB niiA4</i>                                                   | This work                        |

| MAD number | Genotype                                                                                                                                             | Source    |
|------------|------------------------------------------------------------------------------------------------------------------------------------------------------|-----------|
| 6511       | <i>pyrG89; riboBAf-prom-gfp-chsB; nkuAΔ::bar pyroA4; :pyrG<sup>Af</sup>::niiAp::slaB; riboB2</i>                                                     | This work |
| 6552       | <i>pyrG89?; nkuAΔ::bar? pyroA4; pyrG<sup>Af</sup>::chsBprom-gfp-chsB; nudA2 chaA1</i>                                                                | This work |
| 6553       | <i>pyrG89?; wA3; nkuAΔ::bar? pyroA4; pyrG<sup>Af</sup>::chsBprom-gfp-chsB ; nudA5</i>                                                                | This work |
| 6559       | <i>pyrG89? pabaA1; rabBΔ::riboB<sup>Af</sup>; nkuAΔ::bar? pyroA4; inuA-HA-3'UTR-pyrG<sup>Af</sup>? riboB2?; pyrG<sup>Af</sup>::chsBprom-gfp-chsB</i> | This work |
| 6290       | <i>pyrG89; pyroA4 nkuAΔ::bar; vps51Δ::pyrG<sup>Af</sup>; riboB2</i>                                                                                  | This work |
| 5698       | <i>pyrG89; vps52Δ::pyrG<sup>Af</sup>; pyroA4 nkuAΔ::bar; riboB2</i>                                                                                  | This work |
| 6501       | <i>pyrG89; pyroA4 nkuAΔ::bar; vps53Δ::pyrG<sup>Af</sup>; riboB2</i>                                                                                  | This work |
| 5795       | <i>pyrG89; vps54Δ::pyrG<sup>Af</sup>; pyroA4 nkuAΔ::bar; riboB2</i>                                                                                  | This work |
| 6341       | <i>pyrG89; vps54-Stag::pyrG<sup>Af</sup>; pyroA4 nkuAΔ::bar; riboB2</i>                                                                              | This work |
| 6503       | <i>pyrG89; pyroA4 nkuAΔ::bar; vps51-Stag::pyrG<sup>Af</sup>; riboB2</i>                                                                              | This work |
| 6467       | <i>pyrG89; wA4 vps52Δ::pyrG<sup>Af</sup>; pyroA4[pyroA*-gpdA<sup>mini</sup>::mrfp-PH<sup>OSBP</sup>] nkuAΔ::bar; riboB2</i>                          | This work |
| 6469       | <i>pyrG89; wA4; pyroA4[pyroA*-gpdA<sup>mini</sup>::mrfp-PH<sup>OSBP</sup>] nkuAΔ::bar; vps53Δ::pyrG<sup>Af</sup>; riboB2</i>                         | This work |
| 6471       | <i>pyrG89; wA4 vps54Δ::pyrG<sup>Af</sup>; pyroA4[pyroA*-gpdA<sup>mini</sup>::mrfp-PH<sup>OSBP</sup>] nkuAΔ::bar; riboB2</i>                          | This work |
| 6494       | <i>pyrG89; wA4; pyroA4[pyroA*-gpdA<sup>mini</sup>::mrfp-PH<sup>OSBP</sup>] nkuAΔ::bar; vps51Δ::pyrG<sup>Af</sup>; riboB2</i>                         | This work |

\*Strain numbers refer to the MAD (Madrid, CIB-CSIC) collection.
