# Supplementary material for: Endocytic recycling via the TGN underlies the polarized hyphal mode of life
Source: PubMed Central journal article supplement (PMC5880334; doi:10.1371/journal.pgen.1007291), 2018-04-02
Supplement: pgen.1007291.s007.pdf [file pgen.1007291.s007.pdf]

Table S2. Oligonucleotides used for genetic manipulations and diagnostic PCRs

| Code    | Name                      | 5'-3' Sequence                                     |
|---------|---------------------------|----------------------------------------------------|
| MHG_144 | Fw chsB orf medio         | TACATCTACCTTGCGTTCCTGC                             |
| MHG_145 | Rev chsB final            | CCGACGGGCGAAGCAGCAG                                |
| MHG_146 | Fw fus chsB-gfp           | CTGCTGCTTCGCCCGTCGGGGAGCTGGTGCAGGCGCTGGAGCC        |
| MHG_147 | rev fus gfp-3utr chsB     | CCATTAGGCAAAGCATGCTCTTATTATTTGTATAGTTCATCCATGCC    |
| MHG_148 | Fw 3'utr chsB             | TAAGAGCATGCTTTGCCTAATGG                            |
| MHG_149 | rev chsB final transcrip  | TACAGTACGGGATTAGAGTAAAG                            |
| MHG_150 | fw fus chsB dwn-pyrG      | CTTTACTCTAATCCCGTACTGTAACCGGTCGCCTCAAACAATGCTC     |
| MHG_151 | rev fus pyrG-down chsB    | CTTGACACAAGCCATCGCCTCCTGTCTGAGAGGAGGCACTGATGCG     |
| MHG_152 | fw chsB down              | GAGGCGATGGCTTGTGTACAAG                             |
| MHG_153 | rev chsB down             | GGTAAATCTTTTGCCTGCACTTG                            |
| MHG_166 | fw chsB up                | TTGGTGCTCAATAAGATTGGCTG                            |
| MHG_167 | rev chsB up               | GGTTAAACTGGTAGTATGTGCG                             |
| MHG_168 | fw fus up chsB-pyrG       | CGCACATACTACCAGTTTAACCACCGGTCGCCTCAAACAATGCTC      |
| MHG_169 | rev fus down-chsB pyrG    | CTTTCCATTAGGCAAAGCATGCTCCTGTCTGAGAGGAGGCACTGATGCG  |
| MHG_170 | fw chsB up                | GAGCATGCTTTGCCTAATGGAAAG                           |
| MHG_171 | rev fus mcherry-3utr chsB | CCATTAGGCAAAGCATGCTCTTATTACTTGTACAGCTCGTCCATGC     |
| MHG_174 | rev medio orf chsB        | CAAGGATAAACTGCAAGAGCAGG                            |
| MHG_231 | Fw upstream real chsB     | AAGAATAGGAACAAAGACCGCTAG                           |
| MHG_232 | Rev up chsB               | CGGCCTGGCGGTAATTTAGTTC                             |
| MHG_233 | Fw fus up chsB-pyrG       | AGAACTAAATTACCGCCAGGCCGACCGGTCGCCTCAAACAATGCTCTTCA |
| MHG_234 | Rev fus pyrG pr. chsB     | AGCCAATCTTATTGAGCACCAAGCTGTCTGAGAGGAGGCACTGATGC    |
| MHG_235 | Fw prom. chsB             | CTTGGTGCTCAATAAGATTGGC                             |
| MHG_236 | Rev 5'utr chsB            | GGTTAAACTGGTAGTATGTGCG                             |
| MHG_237 | Fw fus 5'utr chs-GFPm     | ATTCGCACATACTACCAGTTTAACCATGAGCAAGGGCGAGGAGCTCTTC  |

| Code    | Name                      | 5'-3' Sequence                                    |
|---------|---------------------------|---------------------------------------------------|
| MHG_238 | Rev fus GFPm-GA           | ACCGGCTCCAGCGCCTGCACCAGCTCCCTTGTAGAGCTCGTCCATGCCG |
| MHG_239 | Fw fus ga-chsB sin atg    | GAGCTGGTGCAGGCGCTGGAGCCGGTGCCGCCTACCACGGCTCTGGTCC |
| MHG_261 | rev GAs                   | GGCACCGGCTCCAGCGCC                                |
| MHG_262 | fw fus 5'utr chsB-mcherry | TCTATTCGCACATACTACCAGTTTAACCATGGTGAGCAAGGGCGAGGAG |
| MHG_282 | Fw fus up chsB-riboBAf    | GAACTAAATTACCGCCAGGCCGAAGAGGGCCGTTTCAGGAGTCTGG    |
| MHG_283 | Rev fus riboBAf-prom chsB | GCCAATCTTATTGAGCACCAAGCAGAACGTTTGCGCTGCAGAAC      |
| IBP70   | Fw AN2736 (vps53)_ext     | GAATGTTTCCCAATTCCTGGAC                            |
| IBP71   | Rv AN2736 (vps53)_ext     | GAGAAGAACCTACATCCTTAGCG                           |
| IBP88   | Fw upstream AN3015        | GCATCCTGAAGAATTAATCTGTG                           |
| IBP89   | Rv upstream AN3015        | CATGTATTATACGAAAGGATCTGG                          |
| IBP90   | Fw AN3015-pyrGAf          | CAGATCCTTTCGTATAATACATGACCGGTGCCTCAAACAATGCTC     |
| IBP91   | Rv AN3015-pyrGAf          | GATCAACTCCAAATCAGCTCCGTCTGAGAGGAGGCACTGATG        |
| IBP92   | Fw downstream AN3015      | GGAGCTGATTTGGAGTTGATC                             |
| IBP93   | Rv downstream AN3015      | CAAGATGGCTTATTCACCAATG                            |
| IBP103  | Fw AN3015 externalNEW     | CCAGCAGTCTTGCTTCCTC                               |
| IBP104  | Rv AN3015 externalNEW     | GATCTTTCGTGCTGACAGTGC                             |
| IBP110  | Fw ORF vps54-Stag         | GAGAAGACACGGTCTGCCGTG                             |
| IBP111  | Rv ORF vps54-Stag         | GTGCTGGCCCTGTCCCTTGG                              |
| IBP112  | Fw vps54-S-pyrG           | GAGGCCAAGGGACAGGGCCAGCACGGAGCTGGTGCAGGCGCTGG      |
| IBP113  | Fw Vps54-S_EXT            | CCACCACATTCTCCTGCAGTC                             |
| IBP114  | Rv Vps54-S_EXT            | CTTCTAGAACCAGCGGATGCG                             |
| IBP115  | Fw ORF vps51-Stag         | CACCCGCCTCCTCGCGAC                                |
| IBP116  | Rv ORF vps51-Stag         | ATCGGCTTCGTCCCTCCTTTTGC                           |
| IBP117  | Fw vps51-S-pyrG           | GCAAAGGAGGACGAAGCCGATGGAGCTGGTGCAGGCGCTGG         |
| IBP118  | Fw vps51-S-tag EXT        | CATGATGTCTACCATCTCCTC                             |
| IBP121  | Fw upstream vps53         | CAGCGATGTGCTATGTTTGCG                             |
| IBP122  | Rv upstream vps53         | CATTAGTTCTCGGGAATTGACG                            |
| IBP123  | Fw pyrGaf-vps53           | CGTCAATTCCCGAGAATAATGCCGGTGCCTCAAACAATGC          |
| IBP124  | Rv pyrGaf-vps53           | GCCCACCCACATCAGCCATCGTCTGAGAGGAGGCACTGATG         |

| Code   | Name                        | 5'-3' Sequence                                     |
|--------|-----------------------------|----------------------------------------------------|
| IBP125 | Fw downstream vps53         | GATGGCTGATGTGGGTGGGC                               |
| IBP126 | Rv downstream vps53         | GGAACAGCCAGCTGAAGGCG                               |
| MP362  | Fw 5UTR Vps52               | CCTTGGCGTGACCGTGCTTACC                             |
| MP363  | Rev 5UTR Vps52              | GTTGGAGCGCGAAGGATATTAG                             |
| MP364  | Fw join 5UTR Vps52 pyrGAf   | TCCTCCTAATATCCTTCGCGCTCCAACGTAACGGCCGCCAGTGTGCTG   |
| MP365  | Rev join 3UTR Vps52- pyrGAf | GTGCTATGAATAGCACCGGTGTGCATTCTGTCTGAGAGGAGGCACTGATG |
| MP366  | Fw 3UTR Vps52               | AGAATGCACACCGGTGCTATTC                             |
| MP367  | Rev 3UTR Vps52              | CGTTACGTCCCATTGCTCTTC                              |
| MP419  | Fw 5UTR Vps54               | CAGTAAGTCTTCGCCACTCAGCC                            |
| MP420  | Rev 5UTR Vps54              | CTCGCCGTCAAACCTGGCGACTC                            |
| MP421  | Fw join 5UTR Vps54-pyrGAf   | GCTGTTGAGTCGCCAGTTTGACGGCGAGGTAACGGCCGCCAGTGTGCTG  |
| MP422  | Rev join 3UTR Vps54-pyrGAf  | GCGCACACATGGTGATGATTATAGGTACGTCTGAGAGGAGGCACTGATG  |
| MP423  | Fw 3UTR Vps54               | GTACCTATAATCATCACCATGTGTG                          |
| MP424  | Rev 3UTR Vps54              | CGCTCTCAGACCAATGACGCC                              |
